# Supplementary material for: Identification of HNF4A Mutation p.T130I and HNF1A Mutations p.I27L and p.S487N in a Han Chinese Family with Early-Onset Maternally Inherited Type 2 Diabetes
Source: J Diabetes Res. 2016 Feb 11;2016:3582616. doi: 10.1155/2016/3582616 (PMC4766352; doi:10.1155/2016/3582616)
Supplement: Supplementary file 1 — Figure S1 A fundus fluorescein angiography showed that she suffered from nonproliferative retinopathy in her right eye and proliferative retinopathy in left eye. Nonproliferative retinopathy. (A)With intraretinal hemorrhage dots (large arrow) and microaneurysms (small arrow). (B) Fluorescein angiography of the eye shown in A. Leakage from capillary drop-out (open arrow), microaneurysms (small arrow) are seen as multiple dots of hyperfluorescemce, and capillary nonperfusion (large arrow) and the dot hemorrhage do not fluoresce; Proliferative retinopathy. (C) With viteous hemorrhage, intraretinal hemorrhage (small arrow), optic disk edema (larger arrow), and macular edema (open arrow). (D) . Early phase fluorescein angiography shows microaneurysms (small arrow). Figure S2 Sequencing chromatogram for mutations p.T130I(c.389C>T) in HNF4A, and p.I27L(c.79A>C) and p.S487N(c.1460G>A) in HNF1A. Table S1 Primers for amplifying and sequencing MODY genes. Table S2 Clinical information on 12 members of family A. [file 3582616.f1.zip › Table S1.xls]

## Sheet: Sheet2
Table S1:Primers for MODY genes.
Gene	exon	name	primer(5´- 3´)	Touchdown(℃)	Source
NEUROD1	1	YY-01-D_H	5´CAA gCA TTT gTA CAg gTT TAg 3´	65-55	Malecki et al., 1999
		YY-02-D_H	5´CTC CAg gCg AgC CTT AgT CAT C 3´		Malecki et al., 1999
	2	YY-03-D_H	5´CCT CgA AgC CAT gAA CgC Ag 3´	65-55	Malecki et al., 1999
		YY-04-D_H	5´gCT gTC CAT ggT ACC gTA Ag 3´		Malecki et al., 1999
	3	YY-05-D_H	5´CCT gCA ACT CAA TCC TCg gAC 3´	65-55	Malecki et al., 1999
		YY-06-D_H	5´CTg TAA gCA CAg Tgg gTT Cg 3´		Malecki et al., 1999
GCK-E1	a	YY-07-D_H	5'TCC ACT TCA gAA gCC TAC Tg	65-55	Froguel et al., 1992
		YY-08-D_H	5'gAA gAA gAg gTT CCA TCT gA		Froguel et al., 1992
	b	YY-51-D_H	5'AgC Agg CAg gAg CAT CTC Tg	65-55	Froguel et al., 1992
		YY-52-D_L	5'gCT gCT CTC CCA gTg CAA Ag		Froguel et al., 1992
	c	YY-53-D_H	5'CCA gAC TCT CCT CTg AAC TC	65-55	Froguel et al., 1992
		YY-54-D_L	5'gAA gAA gAg gTT CCA TCT gA		Froguel et al., 1992
HNF4a	1a	YY-55-D	ggg CAC Tgg gAg gAg gCA gT	65-55	Stoffel and Duncan, 1997
		YY-56-D	gCC TgT Agg ACC AAC CTA CC		Stoffel and Duncan, 1997
	1b	YY-57-D	TCT ggT gTg CAC gAC gCA C	65-55	Stoffel and Duncan, 1997
		YY-58-D	CTg gAg CTg CAg CCT CAT AC		Stoffel and Duncan, 1997
	1c	YY-59-D	CAC Agg TgT TgC CAA gTg AAg C	65-55	Stoffel and Duncan, 1997
		YY-60-D	CAC CgA gAA ATg Cgg TTA TgT C		Stoffel and Duncan, 1997
	2	YY-61-D	AAg gCT CCC TTA gAT gCC Tg	65-55	Stoffel and Duncan, 1997
		YY-62-D	CCA CTC Agg gAg AAg ACA gAC CT		Stoffel and Duncan, 1997
	3	YY-63-D	CCT AgT TCT gTC CTA AgA gg	65-55	Stoffel and Duncan, 1997
		YY-64-D	gTC ATA AAg TgT ggC TAC Ag		Stoffel and Duncan, 1997
	4	YY-65-D	CCA CCC CCT ACT CCA TCC CTg T	65-55	Stoffel and Duncan, 1997
		YY-66-D	CCC TCC CgT CAg CTg CTC CA		Stoffel and Duncan, 1997
	5	YY-67-D	gTg CAg ggg ACA gAg ACT gC	65-55	Stoffel and Duncan, 1997
		YY-68-D	AAT CAA gCC AgT CCA Cgg CTA T		Stoffel and Duncan, 1997
	6	YY-69-D	gCC CAg CgT CAC TgA gTT ggC TA	65-55	Stoffel and Duncan, 1997
		YY-70-D	TTg CCT ggg TgA gTg CCA Tg		Stoffel and Duncan, 1997
	7	YY-71-D	gCA CCA gCT ATC TTg CCA AC	65-55	Stoffel and Duncan, 1997
		YY-72-D	Agg AgA AgT CTg gCA gAg Cg		Stoffel and Duncan, 1997
	8	YY-73-D	ggg ACA TCT ggg TCT TgA CTC C	65-55	Stoffel and Duncan, 1997
		YY-74-D	TCA CTg TgT gAg gCC TgT CTC C		Stoffel and Duncan, 1997
	9	YY-75-D	Tgg TTg ATT ggC CAC gCC Tg	65-55	Stoffel and Duncan, 1997
		YY-76-D	ATC CTg gTT CTA CCT TCT Ag		Stoffel and Duncan, 1997
	10	YY-77-D	CAT TTA CTC CCA CAA Agg CT	65-55	Stoffel and Duncan, 1997
		YY-78-D	gAC CAC gTg ATC ACC Agg Tg		Stoffel and Duncan, 1997
HNF1a	1	YY-79-D	ggC Agg CAA ACg CAA CCC ACg	65-55	Yamagata et al., 1996
		YY-80-D	gAA ggg ggg CTC gTT Agg AgC		Yamagata et al., 1996
	2	YY-81-D	CAT gCA CAg TCC CCA CCC TCA	65-55	Yamagata et al., 1996
		YY-82-D	CTT CCA gCC CCC ACC TAT gAg		Yamagata et al., 1996
	3	YY-83-D	ggg CAA ggT CAg ggg AAT ggA	65-55	Yamagata et al., 1996
		YY-84-D	CAg CCC AgA CCA AAC CAg CAC		Yamagata et al., 1996
	4	YY-85-D	CAg AAC CCT CCC CTT CAT gCC	65-55	Yamagata et al., 1996
		YY-86-D	ggT gAC TgC TgT CAC Tgg gAC		Yamagata et al., 1996
	5	YY-87-D	ggC AgA CAg gCA gCT ggC CTA	65-55	Yamagata et al., 1996
		YY-88-D	gCC TCC CTA ggg ACT gCT CCA		Yamagata et al., 1996
	6	YY-89-D	Tgg AgC AgT CCC TAg ggA ggC	65-55	Yamagata et al., 1996
		YY-90-D	gTT gCC CCA TgA TCC CAC		Yamagata et al., 1996
	7	YY-91-D	ggT CTT ggg CAg ggg Tgg gAT	65-55	Yamagata et al., 1996
		YY-92-D	CCC CTg CAT CCA TTg ACA gCC		Yamagata et al., 1996
	8	YY-93-D	gAg gCC Tgg gAC TAg ggC TgT	65-55	Yamagata et al., 1996
		YY-94-D	CTC TgT CAC Agg CCA ggg Ag		Yamagata et al., 1996
	9	YY-95-D	CAg AgC CCC TCA CCC CCA CAT	65-55	Yamagata et al., 1996
		YY-96-D	Cgg ACA gCA ACA gAA ggg gTg		Yamagata et al., 1996
	10	YY-97-D	gTA CCC CTA ggg ACA ggC Agg	65-55	Yamagata et al., 1996
		YY-98-D	ACC CCC CAA gCA ggC AgT ACA		Yamagata et al., 1996
IPF1	1	YY-99-D	gCC ACA CAg TgC CAA ATC CC	65-55	El Habib Hani et al., 1999
		YY-100-D	gAg AAC Cgg AAA ggA gAA Agg g		El Habib Hani et al., 1999
	2	YY-101-D	gCg CTg AAA Tgg gAT gCT g	65-55	El Habib Hani et al., 1999
		YY-102-D	TCC TCg gCg AgT ggT TgA Ag		El Habib Hani et al., 1999
HNF1B	1	YY-103-D	ggg Tgg Agg ggT TCC Tgg AT	65-55	Horikawa et al., 1997
		YY-104-D	Cgg gCg CAg TgT CAC TCA gg		Horikawa et al., 1997
	2	YY-105-D	CTC CCA CTA gTA CCC TAA CC	65-55	Horikawa et al., 1997
		YY-106-D	gAg Agg gCA AAg gTC ACT TCA g		Horikawa et al., 1997
	3	YY-107-D	AgT gAA ggC TAC AgA CCC TAT C	65-55	Horikawa et al., 1997
		YY-108-D	TTC CTg ggT CTg TgT ACT TgC		Horikawa et al., 1997
	4	YY-109-D	TgT gTT TTT ggC CAA gCA CCA	65-55	Horikawa et al., 1997
		YY-110-D	AAC CAg ATA AgA TCC gTg gC		Horikawa et al., 1997
	5	YY-111-D	TgC CgA gTC ATT gTT CCA gg	65-55	Horikawa et al., 1997
		YY-112-D	CCT CTT ATC TTA TCA gCT CCA g		Horikawa et al., 1997
	6	YY-113-D	CTg CTC TTT gTg gTC CAA gTC C	65-55	Horikawa et al., 1997
		YY-114-D	gAg TTT gAA ggA gAC CTA CAg		Horikawa et al., 1997
	7	YY-115-D	ATC CAC CTC TCC TTA TCC CAg	65-55	Horikawa et al., 1997
		YY-116-D	ACT TCC gAg AAA gTT CAg ACC		Horikawa et al., 1997
	8	YY-117-D	TTT gCC TgT gAT TgC ACC TTg	65-55	Horikawa et al., 1997
		YY-118-D	gCC gAg TCC ATg CTT gCC AC		Horikawa et al., 1997
	9	YY-119-D	CTT TgC Tgg TTg AgT Tgg gC	65-55	Horikawa et al., 1997
		YY-120-D	TTC CAT gAC AgC TgC CCA gAg		Horikawa et al., 1997
